# Supplementary material for: Using Serological Markers for the Surveillance of Plasmodium vivax Malaria: A Scoping Review
Source: MDPI journal article supplement (doi:10.3390/pathogens12060791), 2023-05-31
Supplement: s1 [file s1]

**Table S1.** - PRISMA Extension for Scoping Reviews (PRISMA-ScR): Checklist and Explanation.

| SECTION                                              | ITEM | PRISMA-ScR CHECKLIST ITEM                                                                                                                                                                                                                                                                                  | REPORTED ON PAGE # |
|------------------------------------------------------|------|------------------------------------------------------------------------------------------------------------------------------------------------------------------------------------------------------------------------------------------------------------------------------------------------------------|--------------------|
| <b>TITLE</b>                                         |      |                                                                                                                                                                                                                                                                                                            |                    |
| Title                                                | 1    | Identify the report as a scoping review.                                                                                                                                                                                                                                                                   | 1                  |
| <b>ABSTRACT</b>                                      |      |                                                                                                                                                                                                                                                                                                            |                    |
| Structured summary                                   | 2    | Provide a structured summary that includes (as applicable): background, objectives, eligibility criteria, sources of evidence, charting methods, results, and conclusions that relate to the review questions and objectives.                                                                              | 1                  |
| <b>INTRODUCTION</b>                                  |      |                                                                                                                                                                                                                                                                                                            |                    |
| Rationale                                            | 3    | Describe the rationale for the review in the context of what is already known. Explain why the review questions/objectives lend themselves to a scoping review approach.                                                                                                                                   | 1-3                |
| Objectives                                           | 4    | Provide an explicit statement of the questions and objectives being addressed with reference to their key elements (e.g., population or participants, concepts, and context) or other relevant key elements used to conceptualize the review questions and/or objectives.                                  | 3                  |
| <b>METHODS</b>                                       |      |                                                                                                                                                                                                                                                                                                            |                    |
| Protocol and registration                            | 5    | Indicate whether a review protocol exists; state if and where it can be accessed (e.g., a Web address); and if available, provide registration information, including the registration number.                                                                                                             | 3                  |
| Eligibility criteria                                 | 6    | Specify characteristics of the sources of evidence used as eligibility criteria (e.g., years considered, language, and publication status), and provide a rationale.                                                                                                                                       | 3                  |
| Information sources                                  | 7    | Describe all information sources in the search (e.g., databases with dates of coverage and contact with authors to identify additional sources), as well as the date the most recent search was executed.                                                                                                  | 3                  |
| Search                                               | 8    | Present the full electronic search strategy for at least 1 database, including any limits used, such that it could be repeated.                                                                                                                                                                            | 3                  |
| Selection of sources of evidence                     | 9    | State the process for selecting sources of evidence (i.e., screening and eligibility) included in the scoping review.                                                                                                                                                                                      | 3                  |
| Data charting process                                | 10   | Describe the methods of charting data from the included sources of evidence (e.g., calibrated forms or forms that have been tested by the team before their use, and whether data charting was done independently or in duplicate) and any processes for obtaining and confirming data from investigators. | 3-4                |
| Data items                                           | 11   | List and define all variables for which data were sought and any assumptions and simplifications made.                                                                                                                                                                                                     | 3-4                |
| Critical appraisal of individual sources of evidence | 12   | If done, provide a rationale for conducting a critical appraisal of included sources of evidence; describe the methods used and how this information was used in any data synthesis (if appropriate).                                                                                                      | N/A                |
| Synthesis of results                                 | 13   | Describe the methods of handling and summarizing the data that were charted.                                                                                                                                                                                                                               | 3-4                |

| RESULTS                                       |    |                                                                                                                                                                                                 |         |
|-----------------------------------------------|----|-------------------------------------------------------------------------------------------------------------------------------------------------------------------------------------------------|---------|
| Selection of sources of evidence              | 14 | Give numbers of sources of evidence screened, assessed for eligibility, and included in the review, with reasons for exclusions at each stage, ideally using a flow diagram.                    | 4       |
| Characteristics of sources of evidence        | 15 | For each source of evidence, present characteristics for which data were charted and provide the citations.                                                                                     | 4-5, S2 |
| Critical appraisal within sources of evidence | 16 | If done, present data on critical appraisal of included sources of evidence (see item 12).                                                                                                      | N/A     |
| Results of individual sources of evidence     | 17 | For each included source of evidence, present the relevant data that were charted that relate to the review questions and objectives.                                                           | 5-8     |
| Synthesis of results                          | 18 | Summarize and/or present the charting results as they relate to the review questions and objectives.                                                                                            | 5-9     |
| DISCUSSION                                    |    |                                                                                                                                                                                                 |         |
| Summary of evidence                           | 19 | Summarize the main results (including an overview of concepts, themes, and types of evidence available), link to the review questions and objectives, and consider the relevance to key groups. | 11-12   |
| Limitations                                   | 20 | Discuss the limitations of the scoping review process.                                                                                                                                          | 12-13   |
| Conclusions                                   | 21 | Provide a general interpretation of the results with respect to the review questions and objectives, as well as potential implications and/or next steps.                                       | 13      |
| FUNDING                                       |    |                                                                                                                                                                                                 |         |
| Funding                                       | 22 | Describe sources of funding for the included sources of evidence, as well as sources of funding for the scoping review. Describe the role of the funders of the scoping review.                 | 13      |

*Adapted from: [27].*

**Table S2.** – List of Included studies.

| Title                                                                                                                                                                                                  | Authors                                                                                                                                                                                                  | Year |
|--------------------------------------------------------------------------------------------------------------------------------------------------------------------------------------------------------|----------------------------------------------------------------------------------------------------------------------------------------------------------------------------------------------------------|------|
| The hide and seek of Plasmodium vivax in West Africa: report from a large-scale study in Beninese asymptomatic subjects. [97]                                                                          | Poirier P; Doderer-Lang C; Atchade PS; Lemoine JP; de l'Isle MC; Abou-Bacar A; Pfaff AW; Brunet J; Arnoux L; Haar E; Filisetti D; Perrotey S; Chabi NW; Akpovi CD; Anani L; Bigot A; Sanni A; Candolfi E | 2016 |
| Probability of antibody formation against circumsporozoite protein of Plasmodium vivax among Korean malaria patients. [57]                                                                             | Nam HW; Song KJ; Ahn HJ; Yang Z; Chong CK; Cho PY; Ahn SK; Kim TS                                                                                                                                        | 2014 |
| IgG isotype to C-terminal 19 kDa of Plasmodium vivax merozoite surface protein 1 among subjects with different levels of exposure to malaria in Brazil. [42]                                           | Morais CG; Soares IS; Carvalho LH; Fontes CJ; Krettli AU; Braga EM                                                                                                                                       | 2005 |
| Heterogeneous malaria transmission in long-term Afghan refugee populations: a cross-sectional study in five refugee camps in northern Pakistan. [119]                                                  | Wahid S; Stresman GH; Kamal SS; Sepulveda N; Kleinschmidt I; Bousema T; Drakeley C                                                                                                                       | 2016 |
| Seroprevalence of Plasmodium vivax Circumsporozoite Protein Antibody in High-Risk Malaria Areas in Korea. [126]                                                                                        | Lee J; Jin K; Ahn SK; Lee SK; Kwon HW; Na BK; Kim TS                                                                                                                                                     | 2021 |
| Epidemiological and ecological aspects related to malaria in the area of influence of the lake at Porto Primavera dam, in western São Paulo State, Brazil. [61]                                        | Gomes Ade C; Paula MB; Duarte AM; Lima MA; Malafronte Rdos S; Mucci LF; Gotlieb SL; Natal D                                                                                                              | 2008 |
| Seroprevalence of antibodies to repetitive domains of Plasmodium vivax circumsporozoite protein in United Arab Emirates children. [73]                                                                 | Abu-Zeid YA; Alwash R; Shaheen HM; Bin-Othman SA; Lukic ML; Amiri KM; Charoenvit Y                                                                                                                       | 2002 |
| Malaria epidemiology in low-endemicity areas of the Atlantic Forest in the Vale do Ribeira, São Paulo, Brazil. [52]                                                                                    | Curado I; Dos Santos Malafronte R; de Castro Duarte AM; Kirchgatter K; Branquinho MS; Bianchi Galati EA                                                                                                  | 2006 |
| Screening for malaria antigen and anti-malarial IgG antibody in forcibly-displaced Myanmar nationals: Cox's Bazar district, Bangladesh, 2018. [125]                                                    | Lu A; Cote O; Dimitrova SD; Cooley G; Alamgir A; Uzzaman MS; Flora MS; Widiati Y; Akhtar MS; Vandenen M; Ehlman DC; Bennett SD; Feldstein LR; Rogier E                                                   | 2020 |
| Seroprevalence of malaria infections in Korean troops on a peacekeeping mission in East Timor from 2001 to 2002. [70]                                                                                  | Chang EA; Park I; Kim JY; Suh IB; An SS; Lim CS; Kim YK; Lee KN                                                                                                                                          | 2004 |
| Seroprevalence of Plasmodium vivax in the Republic of Korea (2003-2005) using indirect fluorescent antibody test. [68]                                                                                 | Kim TS; Kang YJ; Lee WJ; Na BK; Moon SU; Cha SH; Lee SK; Park YK; Pak JH; Cho PY; Sohn Y; Lee HW                                                                                                         | 2014 |
| Naturally acquired antibodies to merozoite surface protein (MSP)-1(19) and cumulative exposure to Plasmodium falciparum and Plasmodium vivax in remote populations of the Amazon Basin of Brazil. [53] | Ladeia-Andrade S; Ferreira MU; Scopel KK; Braga EM; Bastos Mda S; Wunderlich G; Coura JR                                                                                                                 | 2007 |
| Plasmodium vivax and Plasmodium falciparum infections in the Republic of Djibouti: evaluation of their prevalence and potential determinants. [116]                                                    | Khairah BA; Briolant S; Pascual A; Mokrane M; Machault V; Travailé C; Khairah MA; Farah IH; Ali HM; Abdi AI; Ayeh SN; Darar HY; Ollivier L; Waiss MK; Bogreau H; Rogier C; Pradines B                    | 2012 |
| Prevalence of Plasmodium vivax VK210 and VK247 subtype in Myanmar. [45]                                                                                                                                | Kim TS; Kim HH; Lee SS; Na BK; Lin K; Cho SH; Kang YJ; Kim DK; Sohn Y; Kim H; Lee HW                                                                                                                     | 2010 |
| Current and cumulative malaria infections in a setting embarking on elimination: Amhara, Ethiopia. [82]                                                                                                | Yalew WG; Pal S; Bansil P; Dabbs R; Tetteh K; Guinovart C; Kalnoky M; Serda BA; Tesfay BH; Beyene BB; Seneviratne C;                                                                                     | 2017 |

|                                                                                                                                                                                                |                                                                                                                                                                                                                          |      |
|------------------------------------------------------------------------------------------------------------------------------------------------------------------------------------------------|--------------------------------------------------------------------------------------------------------------------------------------------------------------------------------------------------------------------------|------|
|                                                                                                                                                                                                | Littrell M; Yokobe L; Noland GS; Domingo GJ; Getachew A; Drakeley C; Steketee RW                                                                                                                                         |      |
| Spatial cluster analysis of Plasmodium vivax and P. malariae exposure using serological data among Haitian school children sampled between 2014 and 2016. [30]                                 | Oviedo A; Herman C; Knipes A; Worrell CM; Fox LM; Desir L; Fayette C; Javel A; Monestime F; Mace KE; Chang MA; Lemoine JF; Won K; Udhayakumar V; Rogier E                                                                | 2022 |
| Multiplex serology demonstrate cumulative prevalence and spatial distribution of malaria in Ethiopia. [85]                                                                                     | Assefa A; Ali Ahmed A; Deressa W; Sime H; Mohammed H; Kebede A; Solomon H; Teka H; Gurralla K; Matei B; Wakeman B; Wilson GG; Sinha I; Maude RJ; Ashton R; Cook J; Shi YP; Drakeley C; von Seidlein L; Rogier E; Hwang J | 2019 |
| Sequence conservation of Plasmodium vivax glutamate dehydrogenase among Korean isolates and its application in seroepidemiology. [122]                                                         | Seol B; Shin HI; Kim JY; Jeon BY; Kang YJ; Pak JH; Kim TS; Lee HW                                                                                                                                                        | 2017 |
| Serological measures to assess the efficacy of malaria control programme on Ambae Island, Vanuatu. [88]                                                                                        | Idris ZM; Chan CW; Mohammed M; Kalkoa M; Taleo G; Junker K; Arcà B; Drakeley C; Kaneko A                                                                                                                                 | 2017 |
| Malaria epidemiology in low-endemicity areas of the northern coast of Ecuador: high prevalence of asymptomatic infections. [7]                                                                 | Sáenz FE; Arévalo-Cortés A; Valenzuela G; Vallejo AF; Castellanos A; Poveda-Loayza AC; Gutierrez JB; Alvarez A; Yan YH; Benavides Y; Castro LE; Arévalo-Herrera M; Herrera S                                             | 2017 |
| Serologically defined variations in malaria endemicity in Pará state, Brazil. [118]                                                                                                            | Cunha MG; Silva ES; Sepúlveda N; Costa SP; Saboia TC; Guerreiro JF; Póvoa MM; Corran PH; Riley E; Drakeley CJ                                                                                                            | 2014 |
| Malaria serology data from the Guiana shield: first insight in IgG antibody responses to Plasmodium falciparum, Plasmodium vivax and Plasmodium malariae antigens in Suriname. [124]           | Labadie-Bracho MY; van Genderen FT; Adhin MR                                                                                                                                                                             | 2020 |
| A multianalyte Dot-ELISA for simultaneous detection of malaria, Chagas disease, and syphilis-specific IgG antibodies. [33]                                                                     | Coelho JS; Soares IS; Lemos EA; Jimenez MC; Kudó ME; Moraes SL; Ferreira AW; Sanchez MC                                                                                                                                  | 2007 |
| Malaria epidemiology in central Myanmar: identification of a multi-species asymptomatic reservoir of infection. [121]                                                                          | Ghinai I; Cook J; Hla TT; Htet HM; Hall T; Lubis IN; Ghinai R; Hesketh T; Naung Y; Lwin MM; Latt TS; Heymann DL; Sutherland CJ; Drakeley C; Field N                                                                      | 2017 |
| Prevalence of antibodies to the circumsporozoite protein of Plasmodium vivax in five different regions of Korea. [101]                                                                         | Lee KN; Suh IB; Chang EA; Kim SD; Cho NS; Park PW; An SS; Park O; Lim C                                                                                                                                                  | 2003 |
| Specificity of the IgG antibody response to Plasmodium falciparum, Plasmodium vivax, Plasmodium malariae, and Plasmodium ovale MSP1(19) subunit proteins in multiplexed serologic assays. [37] | Priest JW; Plucinski MM; Huber CS; Rogier E; Mao B; Gregory CJ; Candrinho B; Colborn J; Barnwell JW                                                                                                                      | 2018 |
| Hotspots of Malaria Transmission in the Peruvian Amazon: Rapid Assessment through a Parasitological and Serological Survey. [75]                                                               | Rosas-Aguirre A; Speybroeck N; Llanos-Cuentas A; Rosanas-Urgell A; Carrasco-Escobar G; Rodriguez H; Gamboa D; Contreras-Mancilla J; Alava F; Soares IS; Remarkue E; D Alessandro U; Erhart A                             | 2015 |
| Seroprevalence to the circumsporozoite protein peptide antigen of Plasmodium vivax in Korean children. [48]                                                                                    | Lim CS; Yoon JK; Chang EA; Suh IB; An SS; Lee KH; Chung JT; Tockgo YC                                                                                                                                                    | 2005 |
| Sero-epidemiological evaluation of changes in Plasmodium falciparum and Plasmodium vivax                                                                                                       | Cook J; Speybroeck N; Sochantá T; Somony H; Sokny M; Claes F; Lemmens K; Theisen                                                                                                                                         | 2012 |

|                                                                                                                                                                                                                                                          |                                                                                                                                                                                                                                                                                                                       |      |
|----------------------------------------------------------------------------------------------------------------------------------------------------------------------------------------------------------------------------------------------------------|-----------------------------------------------------------------------------------------------------------------------------------------------------------------------------------------------------------------------------------------------------------------------------------------------------------------------|------|
| transmission patterns over the rainy season in Cambodia. [81]                                                                                                                                                                                            | M; Soares IS; D'Alessandro U; Coosemans M; Erhart A                                                                                                                                                                                                                                                                   |      |
| Detection of antibodies against the CB9 to ICB10 region of merozoite surface protein-1 of <i>Plasmodium vivax</i> among the inhabitants in epidemic areas. [77]                                                                                          | Kim TS; Sohn Y; Kim JY; Lee WJ; Na BK; Kang YJ; Lee HW                                                                                                                                                                                                                                                                | 2014 |
| Prevalence and level of antibodies to the circumsporozoite protein of human malaria parasites in five states of the Amazon region of Brazil. [54]                                                                                                        | Arruda ME; Zimmerman RH; Souza RM; Oliveira-Ferreira J                                                                                                                                                                                                                                                                | 2007 |
| Molecular cloning and expression of the VK247 circumsporozoite protein for serodiagnosis of variant form <i>Plasmodium vivax</i> . [35]                                                                                                                  | Kim TS; Kim HH; Lee SS; Oh CM; Choi KM; Lin K; Kim JY; Na BK; Han ET; Sohn Y; Kim H; Lee HW                                                                                                                                                                                                                           | 2011 |
| Evaluation of <i>Plasmodium vivax</i> ELISA for the blood screen. [40]                                                                                                                                                                                   | Nam MH; Kim JS; Cho CH; Han ET; Lee WJ; Lee HK; An SS; Lim CS; Lee KN                                                                                                                                                                                                                                                 | 2010 |
| Serologic responses of Korean soldiers serving in malaria-endemic areas during a recent outbreak of <i>Plasmodium vivax</i> . [72]                                                                                                                       | Park CG; Chwae YJ; Kim JI; Lee JH; Hur GM; Jeon BH; Koh JS; Han JH; Lee SJ; Park JW; Kaslow DC; Strickman D; Roh CS                                                                                                                                                                                                   | 2000 |
| Characterization of <i>Plasmodium vivax</i> heat shock protein 70 and evaluation of its value for serodiagnosis of tertian malaria. [36]                                                                                                                 | Na BK; Park JW; Lee HW; Lin K; Kim SH; Bae YA; Sohn WM; Kim TS; Kong Y                                                                                                                                                                                                                                                | 2007 |
| Efficacy of the merozoite surface protein 1 of <i>Plasmodium vivax</i> as an antigen for ELISA to diagnose malaria. [32]                                                                                                                                 | Kim YM; Hwang HA; Yun WS; Kim SI; Lee KW; Park SK; Lee YJ; Kim TK; Wongsrichanalai C; Sakanari JA; Park H                                                                                                                                                                                                             | 2004 |
| Detection of an antibody against <i>Plasmodium vivax</i> in residents of Gimpo-si, South Korea, using an indirect fluorescent antibody test. [114]                                                                                                       | Lee WJ; Kim HH; Hwang SM; Park MY; Kim NR; Cho SH; In TS; Kim JY; Sat-tabongkot J; Sohn Y; Kim H; Lee JK; Lee HW                                                                                                                                                                                                      | 2011 |
| Development and validation of serological markers for detecting recent <i>Plasmodium vivax</i> infection. [41]                                                                                                                                           | Longley RJ; White MT; Takashima E; Brewster J; Morita M; Harbers M; Obadia T; Robinson LJ; Matsuura F; Liu ZSJ; Li-Wai-Suen CSN; Tham WH; Healer J; Huon C; Chitnis CE; Nguitragool W; Monteiro W; Proietti C; Doolan DL; Siqueira AM; Ding XC; Gonzalez IJ; Kazura J; Lacerda M; Sat-tabongkot J; Suboi T; Mueller I | 2020 |
| Serological evidence for a decline in malaria transmission following major scale-up of control efforts in a setting selected for <i>Plasmodium vivax</i> and <i>Plasmodium falciparum</i> malaria elimination in Babile district, Oromia, Ethiopia. [84] | Keffale M; Shumie G; Behaksra SW; Chali W; Hoogen LLVD; Hailemeskel E; Mekonnen D; Chanyalew M; Damte D; Fanta T; Ashine T; Chali S; Tetteh KKA; Birhanu DD; Balcha TT; Aseffa A; Drakeley C; Tessema TS; Adamu H; Bousema T; Gadisa E; Tadesse FG                                                                    | 2019 |
| ELISA detection of vivax malaria with recombinant multiple stage-specific antigens and its application to survey of residents in endemic areas. [90]                                                                                                     | Kim S; Ahn HJ; Kim TS; Nam HW                                                                                                                                                                                                                                                                                         | 2003 |
| Evaluation of Immunoglobulin G Responses to <i>Plasmodium falciparum</i> and <i>Plasmodium vivax</i> in Malian School Children Using Multiplex Bead Assay. [67]                                                                                          | Rogier E; Moss DM; Chard AN; Trinies V; Doumbia S; Freeman MC; Lammie PJ                                                                                                                                                                                                                                              | 2017 |
| The shape of the iceberg: quantification of sub-microscopic <i>Plasmodium falciparum</i> and <i>Plasmodium vivax</i> parasitaemia and gametocytaemia in five low endemic settings in Ethiopia. [94]                                                      | Tadesse FG; van den Hoogen L; Lanke K; Schildkraut J; Tetteh K; Aseffa A; Mamo H; Sauerwein R; Felger I; Drakeley C; Gadissa E; Bousema T                                                                                                                                                                             | 2017 |

|                                                                                                                                                            |                                                                                                                                                                        |      |
|------------------------------------------------------------------------------------------------------------------------------------------------------------|------------------------------------------------------------------------------------------------------------------------------------------------------------------------|------|
| Survey for asymptomatic malaria cases in low transmission settings of Iran under elimination programme. [55]                                               | Zoghi S; Mehrizi AA; Raeisi A; Haghdoust AA; Turki H; Safari R; Kahanali AA; Zakeri S                                                                                  | 2012 |
| Evidence for the transmission of Plasmodium vivax in the Republic of the Congo, West Central Africa. [87]                                                  | Culleton R; Ndounga M; Zeyrek FY; Coban C; Casimiro PN; Takeo S; Tsuboi T; Yadava A; Carter R; Tanabe K                                                                | 2009 |
| Evaluation of circumsporozoite protein of Plasmodium vivax to estimate its prevalence in the Republic of Korea: an observational study of incidence. [66]  | Cho PY; Lee SW; Ahn SK; Kim JS; Cha SH; Na BK; Park YK; Lee SK; Lee WJ; Nam HW; Hong SJ; Pak JH; Kang YJ; Sohn Y; Bahk YY; Cho HI; Kim TS; Lee HW                      | 2013 |
| Heterogeneity in response to serological exposure markers of recent Plasmodium vivax infections in contrasting epidemiological contexts. [23]              | Rosado J; White MT; Longley RJ; Lacerda M; Monteiro W; Brewster J; Sattabongkot J; Guzman-Guzman M; Llanos-Cuentas A; Vinetz JM; Gamboa D; Mueller I                   | 2021 |
| Sero-identification of the aetiologies of human malaria exposure (Plasmodium spp.) in the Limu Kossa District of Jimma Zone, South western Ethiopia. [59]  | Feleke SM; Brhane BG; Mamo H; Assefa A; Woyessa A; Ogawa GM; Cama V                                                                                                    | 2019 |
| Molecular typing reveals substantial Plasmodium vivax infection in asymptomatic adults in a rural area of Cameroon. [71]                                   | Fru-Cho J; Bumah VV; Safeukui I; Nkuo-Akenji T; Titanji VP; Haldar K                                                                                                   | 2014 |
| Unexpected high circulation of Plasmodium vivax in asymptomatic children from Kédougou, southeastern Senegal. [92]                                         | Niang M; Diop F; Niang O; Sadio BD; Sow A; Faye O; Diallo M; Sall AA; Perraut R; Toure-Balde A                                                                         | 2017 |
| Using Respondent Driven Sampling to Identify Malaria Risks and Occupational Networks among Migrant Workers in Ranong, Thailand. [120]                      | Wangroongsarb P; Hwang J; Thwing J; Karuchit S; Kumpetch S; Rand A; Drakeley C; MacArthur JR; Kachur SP; Satimai W; Meek S; Sintasath DM                               | 2016 |
| IgG Antibody Responses Are Preferential Compared With IgM for Use as Serological Markers for Detecting Recent Exposure to Plasmodium vivax Infection. [43] | Longley RJ; White MT; Brewster J; Liu ZSJ; Bourke C; Takashima E; Harbers M; Tham WH; Healer J; Chitnis CE; Monteiro W; Lacerda M; Sattabongkot J; Tsuboi T; Mueller I | 2021 |
| Estimating the malaria transmission of Plasmodium vivax based on serodiagnosis. [117]                                                                      | Kim JY; Kim HH; Na BK; Kim YJ; Sohn Y; Kim H; Kim TS; Lee HW                                                                                                           | 2012 |
| Cross sectional study reveals a high percentage of asymptomatic Plasmodium vivax infection in the Amazon Rio Negro area, Brazil. [113]                     | Suárez-Mutis MC; Cuervo P; Leonatti FM; Moraes-Avila SL; Ferreira AW; Fernandes O; Coura JR                                                                            | 2007 |
| Serologic markers for detecting malaria in areas of low endemicity, Somalia, 2008. [65]                                                                    | Bousema T; Youssef RM; Cook J; Cox J; Alegana VA; Amran J; Noor AM; Snow RW; Drakeley C                                                                                | 2010 |
| Asymptomatic Plasmodium infection in a residual malaria transmission area in the Atlantic Forest region: Implications for elimination. [123]               | Miguel RB; Albuquerque HG; Sanchez MCA; Coura JR; Santos SDS; Silva SD; Moreira CJC; Suárez-Mutis MC                                                                   | 2019 |
| Geographical patterns of malaria transmission based on serological markers for falciparum and vivax malaria in Ratanakiri, Cambodia. [47]                  | Kerkhof K; Sluydts V; Heng S; Kim S; Par-eyn M; Willen L; Canier L; Sovannaroeth S; Ménard D; Sochantha T; Coosemans M; Durnez L                                       | 2016 |
| Natural infections with different Plasmodium species induce antibodies reactive to a chimeric Plasmodium vivax recombinant protein. [29]                   | McCaffery JN; Singh B; Nace D; Moreno A; Udhayakumar V; Rogier E                                                                                                       | 2021 |
| Detection of human malaria using recombinant Plasmodium knowlesi merozoite surface protein-1 (MSP-1 <sub>19</sub> ) expressed in Escherichia coli. [34]    | Sonaimuthu P; Cheong FW; Chin LC; Mahmud R; Fong MY; Lau YL                                                                                                            | 2015 |

|                                                                                                                                                                                   |                                                                                                                                                                                           |      |
|-----------------------------------------------------------------------------------------------------------------------------------------------------------------------------------|-------------------------------------------------------------------------------------------------------------------------------------------------------------------------------------------|------|
| Epidemiologic aspects of the malaria transmission cycle in an area of very low incidence in Brazil. [95]                                                                          | Cerutti C Jr; Boulos M; Coutinho AF; Hatab Mdo C; Falqueto A; Rezende HR; Duarte AM; Collins W; Malafronte RS                                                                             | 2007 |
| Malaria in pregnant women living in areas of low transmission on the southeast Brazilian Coast: molecular diagnosis and humoral immunity profile. [64]                            | Hristov AD; Sanchez MC; Ferreira JJ; Lima GF; Inoue J; Costa-Nascimento Mde J; Sanchez AR; Ramos-Sanchez EM; Di Santi SM                                                                  | 2014 |
| Micro-epidemiology of malaria in an elimination setting in Central Vietnam. [46]                                                                                                  | Bannister-Tyrrell M; Xa NX; Kattenberg JH; Van Van N; Dung VKA; Hieu TM; Van Hong N; Rovira-Vallbona E; Thao NT; Duong TT; Rosanas-Urgell A; Peeters Grietens K; Erhart A                 | 2018 |
| Assessment of antibody responses in local and immigrant residents of areas with autochthonous malaria transmission in Greece. [50]                                                | Piperaki ET; Mavrouli M; Tseroni M; Routisias J; Kallimani A; Veneti L; Georgitsou M; Chania M; Georgakopoulou T; Hadjichristodoulou C; Tsakris A                                         | 2015 |
| Anti-malarial seroprevalence assessment during an elimination programme in Chabahar District, south-eastern Iran. [79]                                                            | Zakeri S; van den Hoogen LL; Mehrizi AA; Karimi F; Raeisi A; Drakeley C                                                                                                                   | 2016 |
| Effectiveness of a serological tool to predict malaria transmission intensity in an elimination setting. [80]                                                                     | Dewasurendra RL; Dias JN; Sepulveda N; Gunawardena GS; Chandrasekharan N; Drakeley C; Karunaweera ND                                                                                      | 2017 |
| Relationship between Antibody-Positive Rate against Plasmodium vivax Circumsporozoite Protein and Incidence of Malaria. [102]                                                     | Lee HW; Kang YJ; Cho SH; Na BK; Pak JH; Nam HW; Park YK; Sohn Y; Kim TS                                                                                                                   | 2015 |
| Analysis of anti-Plasmodium IgG profiles among Fulani nomadic pastoralists in northern Senegal to assess malaria exposure. [58]                                                   | Seck MC; Thwing J; Badiane AS; Rogier E; Fall FB; Ndiaye PI; Diongue K; Mbow M; Ndiaye M; Diallo MA; Gomis JF; Mbaye A; Ndiaye T; Gaye A; Sy M; Dème AB; Ndiaye YD; Ndiaye D              | 2020 |
| Spatial Distribution of Plasmodium falciparum and Plasmodium vivax in Northern Ethiopia by Microscopic, Rapid Diagnostic Test, Laboratory Antibody, and Antigen Data. [100]       | Leonard CM; Assefa A; Sime H; Mohammed H; Kebede A; Solomon H; Drakeley C; Murphy M; Hwang J; Rogier E                                                                                    | 2022 |
| Assessing malaria transmission in a low endemicity area of north-western Peru. [78]                                                                                               | Rosas-Aguirre A; Llanos-Cuentas A; Speybroeck N; Cook J; Contreras-Mancilla J; Soto V; Gamboa D; Pozo E; Ponce OJ; Pereira MO; Soares IS; Theisen M; D'Alessandro U; Erhart A             | 2013 |
| Evaluating seroprevalence to circumsporozoite protein to estimate exposure to three species of Plasmodium in the Brazilian Amazon. [74]                                           | Pereira VA; Sanches-Arcila JC; Vasconcelos MPA; Ferreira AR; de Souza Videira L; Teva A; Perce-da-Silva D; Marques MTQ; de Carvalho LH; Banic DM; Pôrto LCS; Oliveira-Ferreira J          | 2018 |
| An immunomics approach for the analysis of natural antibody responses to Plasmodium vivax infection. [31]                                                                         | Chen JH; Chen SB; Wang Y; Ju C; Zhang T; Xu B; Shen HM; Mo XJ; Molina DM; Eng M; Liang X; Gardner MJ; Wang R; Hu W                                                                        | 2015 |
| Common asymptomatic and submicroscopic malaria infections in Western Thailand revealed in longitudinal molecular and serological studies: a challenge to malaria elimination. [8] | Baum E; Sattabongkot J; Sirichaisinthop J; Kiattibutr K; Jain A; Taghavian O; Lee MC; Huw Davies D; Cui L; Felgner PL; Yan G                                                              | 2016 |
| Characterization of Plasmodium falciparum and Plasmodium vivax recent exposure in an area of significantly decreased transmission intensity in Central Vietnam. [63]              | Kattenberg JH; Erhart A; Truong MH; Rovira-Vallbona E; Vu KAD; Nguyen THN; Nguyen VH; Nguyen VV; Bannister-Tyrrell M; Theisen M; Bennet A; Lover AA; Tran TD; Nguyen XX; Rosanas-Urgell A | 2018 |
| Antibody profiles to plasmodium merozoite surface protein-1 in Cambodian adults during                                                                                            | Spring MD; Pichyangkul S; Lon C; Gosi P; Yongvanichit K; Srichairatanakul U;                                                                                                              | 2016 |

|                                                                                                                                                                                               |                                                                                                                                                                                                                                 |      |
|-----------------------------------------------------------------------------------------------------------------------------------------------------------------------------------------------|---------------------------------------------------------------------------------------------------------------------------------------------------------------------------------------------------------------------------------|------|
| an active surveillance cohort with nested treatment study. [89]                                                                                                                               | Limsalakpeth A; Chaisatit C; Chann S; Sriwichai S; Auayapon M; Chaorat-tanakawee S; Dutta S; Prom S; Meng Chour C; Walsh DS; Angov E; Saunders DL                                                                               |      |
| Estimation on local transmission of malaria by serological approach under low transmission setting in Myanmar. [69]                                                                           | Nyunt MH; Soe TN; Shein T; Zaw NN; Han SS; Muh F; Lee SK; Han JH; Park JH; Ha KS; Park WS; Hong SH; Kyaw MP; Han ET                                                                                                             | 2018 |
| Implementation and application of a multiplex assay to detect malaria-specific antibodies: a promising tool for assessing malaria transmission in Southeast Asian pre-elimination areas. [39] | Kerkhof K; Canier L; Kim S; Heng S; Sochantha T; Sovannaroth S; Vigan-Womas I; Coosemans M; Sluydts V; Ménard D; Durnez L                                                                                                       | 2015 |
| A sero-epidemiological study of malaria in human and monkey populations in French Guiana. [49]                                                                                                | Volney B; Pouliquen JF; De Thoisy B; Fandeur T                                                                                                                                                                                  | 2002 |
| Malaria in pregnancy: a passive surveillance study of pregnant women in low transmission areas of Colombia, Latin America.[62]                                                                | Lopez-Perez M; Pacheco MA; Buriticá L; Escalante AA; Herrera S; Arévalo-Herrera M                                                                                                                                               | 2016 |
| Application of 23 Novel Serological Markers for Identifying Recent Exposure to Plasmodium vivax Parasites in an Endemic Population of Western Thailand. [9]                                   | Chotirat S; Nekkab N; Kumpitak C; Hietanen J; White MT; Kiattibutr K; Sangchai P; Brewster J; Schoffer K; Takashima E; Tsuboi T; Harbers M; Chitnis CE; Healer J; Tham WH; Nguitragool W; Mueller I; Sattabongkot J; Longley RJ | 2021 |
| Cross-sectional study of asymptomatic malaria and seroepidemiological surveillance of seven districts in Gia Lai province, Vietnam. [127]                                                     | San NN; Kien NX; Manh ND; Van Thanh N; Chavchich M; Binh NTH; Long TK; Edgel KA; Rovira-Vallbona E; Edstein MD; Martin NJ                                                                                                       | 2022 |
| Serological markers to measure recent changes in malaria at population level in Cambodia. [38]                                                                                                | Kerkhof K; Sluydts V; Willen L; Kim S; Canier L; Heng S; Tsuboi T; Sochantha T; Sovannaroth S; Ménard D; Coosemans M; Durnez L                                                                                                  | 2016 |
| Analysis of serological data to investigate heterogeneity of malaria transmission: a community-based cross-sectional study in an area conducting elimination in Indonesia. [103]              | Surendra H; Wijayanti MA; Murhandarwati EH; Irnawati; Yuniarti T; Mardiaty; Herdiana; Sumiwi ME; Hawley WA; Lobo NF; Cook J; Drakeley C; Supargiyono                                                                            | 2019 |
| Prevalence and seroprevalence of Plasmodium infection in Myanmar reveals highly heterogeneous transmission and a large hidden reservoir of infection. [105]                                   | Edwards HM; Dixon R; Zegers de Beyl C; Celhay O; Rahman M; Myint Oo M; Lwin T; Lin Z; San T; Thwe Han K; Myaing Nyunt M; Plowe C; Stresman G; Hall T; Drakeley C; Hamade P; Aryal S; Roca-Feltrer A; Hlaing T; Thi A            | 2021 |
| Serologic markers in relation to parasite exposure history help to estimate transmission dynamics of Plasmodium vivax. [115]                                                                  | Yildiz Zeyrek F; Palacpac N; Yuksel F; Yagi M; Honjo K; Fujita Y; Arisue N; Takeo S; Tanabe K; Horii T; Tsuboi T; Ishii KJ; Coban C                                                                                             | 2011 |
| Community-based molecular and serological surveillance of subclinical malaria in Myanmar. [83]                                                                                                | O'Flaherty K; Oo WH; Zaloumis SG; Cutts JC; Aung KZ; Thein MM; Drew DR; Razook Z; Barry AE; Parischa N; Zaw NN; Thu HK; Thi A; Htay WYM; Soe AP; Simpson JA; Beeson JG; Agius PA; Fowkes FJI                                    | 2021 |
| Malaria transmission and individual variability of the naturally acquired IgG antibody against the Plasmodium vivax blood-stage antigen in an endemic area in Brazil. [51]                    | Costa EMF; Amador ECC; Silva ES; Alvarenga CO; Pereira PE; Póvoa MM; Cunha MG                                                                                                                                                   | 2020 |



|                                                                                                                                                                                            |                                                                                                                                                         |      |
|--------------------------------------------------------------------------------------------------------------------------------------------------------------------------------------------|---------------------------------------------------------------------------------------------------------------------------------------------------------|------|
| Using serological measures to monitor changes in malaria transmission in Vanuatu. [91]                                                                                                     | Cook J; Reid H; Iavro J; Kuwahata M; Taleo G; Clements A; McCarthy J; Vallely A; Drakeley C                                                             | 2010 |
| Geostatistical modeling of malaria endemicity using serological indicators of exposure collected through school surveys. [112]                                                             | Ashton RA; Kefyalew T; Rand A; Sime H; Assefa A; Mekasha A; Edosa W; Tesfaye G; Cano J; Teka H; Reithinger R; Pullan RL; Drakeley CJ; Brooker SJ        | 2015 |
| Integration of Multiplex Bead Assays for Parasitic Diseases into a National, Population-Based Serosurvey of Women 15-39 Years of Age in Cambodia. [86]                                     | Priest JW; Jenks MH; Moss DM; Mao B; Buth S; Wannemuehler K; Soeung SC; Lucchi NW; Udhayakumar V; Gregory CJ; Huy R; Muth S; Lammie PJ                  | 2016 |
| Antibody Profile Comparison against MSP1 Antigens of Multiple Plasmodium Species in Human Serum Samples from Two Different Brazilian Populations Using a Multiplex Serological Assay. [60] | Monteiro EF; Fernandez-Becerra C; Curado I; Wunderlich G; Hiyane MI; Kirchgatter K                                                                      | 2021 |
| Submicroscopic and asymptomatic Plasmodium falciparum and Plasmodium vivax infections are common in western Thailand - molecular and serological evidence. [6]                             | Baum E; Sattabongkot J; Sirichaisinthop J; Kiattibutr K; Davies DH; Jain A; Lo E; Lee MC; Randall AZ; Molina DM; Liang X; Cui L; Felgner PL; Yan G      | 2015 |
| Blood-stage Plasmodium vivax antibody dynamics in a low transmission setting: A nine year follow-up study in the Amazon region. [44]                                                       | Pires CV; Alves JRS; Lima BAS; Paula RB; Costa HL; Torres LM; Sousa TN; Soares IS; Sanchez BAM; Fontes CJF; Ntumngia FB; Adams JH; Kano FS; Carvalho LH | 2018 |
| Using health facility-based serological surveillance to predict receptive areas at risk of malaria outbreaks in elimination areas. [76]                                                    | Surendra H; Supargiyono; Ahmad RA; Kusumasari RA; Rahayujati TB; Damayanti SY; Tetteh KKA; Chitnis C; Stresman G; Cook J; Drakeley C                    | 2020 |
| Surveillance of Plasmodium vivax transmission using serological models in the border areas of China-Myanmar. [15]                                                                          | Yao M; Xiao L; Sun X; Lin Z; Hao X; Bai QQ; Yin DH                                                                                                      | 2022 |
| Surveillance on the Vivax Malaria in Endemic Areas in the Republic of Korea Based on Molecular and Serological Analyses. [93]                                                              | Lee SK; Hu F; Firdaus ER; Park JH; Han JH; Lee SE; Shin HI; Cho SH; Park WS; Lu F; Han ET                                                               | 2020 |

**Table S3.** – Characteristics of Included Studies.

| Study ID                  | Region               | Study Design      | Total no. participants | No. antigens | Antibody type |
|---------------------------|----------------------|-------------------|------------------------|--------------|---------------|
| Kim, 2004 [32]            | Thailand, Korea      | CS                | 306                    | 1            | IgG, IgM      |
| Coelho, 2007 [33]         | Brazil               | VS                | 103                    | 1            | IgG           |
| Sonaimuthu, 2015 [34]     | DNS                  | VS                | 215                    | 1            | IgG           |
| Kim, 2011 [35]            | Myanmar              | CS                | 100                    | 1            | IgG           |
| Na, 2007 [36]             | Korea, Myanmar       | CS                | 278                    | 1            | IgG           |
| McCaffery, 2021 [29]      | United States        | CS                | 239                    | 2            | IgG           |
| Rogier, 2017 [67]         | Mali                 | CS                | 805                    | 1            | IgG           |
| Priest, 2018 [37]         | Brazil               | Specificity study | N/A                    | 1            | IgG           |
| Seol, 2017 [122]          | Korea                | CS                | 100                    | 1            | IgG           |
| Kattenberg, 2018 [63]     | Vietnam              | CH                | 429                    | 2            | IgG           |
| Chang, 2004 [70]          | East Timor           | CS                | 210                    | 2            | IgG           |
| Lee, 2003 [101]           | Korea                | CS                | 1014                   | 1            | IgG           |
| Lim, 2005 [48]            | Korea                | CS                | 1176                   | 1            | IgG           |
| Morais, 2005 [42]         | Brazil               | CS                | 354                    | 1            | IgG           |
| Park, 2000 [72]           | Korea                | CS                | 1713                   | 3            | IgG, IgM      |
| Kim, 2014a [68]           | Korea                | CS                | 1774                   | 1            | IgG           |
| Hristov, 2014 [64]        | Brazil               | CH                | 125                    | 1            | IgG           |
| Abu-Zeid, 2002 [73]       | United Arab Emirates | CS                | 1006                   | 3            | IgG           |
| Cho, 2013 [66]            | Korea                | CS                | N/A                    | 1            | N/A           |
| Lee, 2011 [114]           | Korea                | CS                | 5797                   | 1            | IgG           |
| Yildiz Zeyrek, 2011 [115] | Turkey               | CS                | 195                    | 4            | IgG, IgM      |
| Volney, 2002 [49]         | Guinea               | CS                | 218                    | 3            | IgG           |
| Piperaki, 2015 [50]       | Greece               | CS                | 1057                   | 2            | IgG, IgM      |
| Kerkhof, 2015 [39]        | Cambodia             | CS                | 2000                   | 7            | IgG           |
| Nam, 2014 [57]            | Korea, India, Uganda | VS                | 126                    | 2            | N/A           |
| Kerkhof, 2016b [38]       | Cambodia             | CS                | 8654                   | 7            | IgG           |
| Priest, 2016 [86]         | Cambodia             | CS                | 2154                   | 1            | IgG           |
| Bousema, 2010 [65]        | Somalia              | CS                | 1044                   | 2            | IgG           |
| Kim, 2014b [77]           | Korea                | CS                | 1774                   | 1            | IgG           |
| Lopez-Perez, 2016 [62]    | Colombia             | DC                | 34                     | 2            | IgG           |
| Kim, 2012 [117]           | Korea                | CS                | 1547                   | N/A          | IgG           |
| Chen, 2015 [31]           | China                | CS                | 25                     | N/A          | IgG           |
| Nam, 2010 [40]            | Korea                | CS                | 911                    | 2            | IgG, IgM      |
| Arruda, 2007 [54]         | Brazil               | CS                | 1206                   | 2            | N/A           |
| Gomes, 2008 [61]          | Brazil               | CS                | 216                    | 3            | IgG           |
| Ladeia-Andrade, 2007 [53] | Brazil               | CS                | 473                    | 1            | IgG           |
| Curado, 2006 [52]         | Brazil               | CS                | 318                    | 3            | IgG, IgM      |
| Fru-Cho, 2014 [71]        | Cameroon             | CS                | 269                    | 2            | N/A           |
| Ashton, 2015 [112]        | Ethiopia             | CS                | 6609                   | 2            | IgG           |
| Wahid, 2016 [119]         | Pakistan             | CS                | 2522                   | 2            | N/A           |
| Cerruti Junior, 2007 [95] | Brazil               | CS                | 1842                   | N/A          | IgG, IgM      |
| Zakeri, 2016 [79]         | Iran                 | CS                | 1479                   | 2            | x             |

|                              |                       |                                 |        |     |          |
|------------------------------|-----------------------|---------------------------------|--------|-----|----------|
| Zoghi, 2012 [55]             | Iran                  | CS                              | 1000   | 1   | IgG      |
| Cook, 2010 [91]              | Vanuatu               | CS                              | 1766   | 2   | IgG      |
| Seck, 2020 [58]              | Senegal               | CS                              | 1472   | 1   | IgG      |
| Dewasurendra, 2017 [80]      | Sri Lanka             | CS                              | 1186   | 2   | IgG      |
| Rosas-Aguirre, 2013 [78]     | Peru                  | CS                              | 2267   | 1   | IgG      |
| Pereira, 2018 [74]           | Brazil                | CS                              | 357    | 1   | IgG      |
| Leonard, 2022 [100]          | Ethiopia              | CS                              | 2279   | 3   | IgG      |
| Lee, 2015 [102]              | Korea                 | CS                              | 1774   | 1   | IgG      |
| Bannister-Tyrrell, 2018 [46] | Vietnam               | CS                              | 186    | 2   | N/A      |
| Lee, 2021 [126]              | Korea                 | CS                              | 3477   | 1   | IgG      |
| Cook, 2012 [81]              | Cambodia              | CS                              | 804    | 1   | IgG      |
| Costa, 2020 [51]             | Brazil                | CS                              | 462    | 1   | IgG      |
| Baum, 2015 [6]               | Thailand              | CS                              | 280    | 515 | N/A      |
| O'Flaherty, 2021 [83]        | Myanmar               | RCT                             | 10857  | 1   | IgG      |
| Suárez-Mutis, 2007 [113]     | Brazil                | CS                              | 109    | 1   | IgG      |
| Spring, 2016 [89]            | Cambodia              | CH                              | 222    | 1   | IgG      |
| Culleton, 2009 [87]          | Republic of the Congo | CS                              | 409    | 2   | IgG      |
| Baum, 2016 [8]               | Thailand              | CS                              | 298    | 515 | N/A      |
| Wangroongsarb, 2016 [120]    | Thailand              | CS                              | 1242   | 4   | N/A      |
| Kim, 2003 [90]               | Korea                 | CS                              | 3262   | 5   | IgG      |
| Idris, 2017 [88]             | Vanuatu               | CS                              | 513    | 3   | IgG      |
| Miguel, 2019 [123]           | Brazil                | CS                              | 314    | 1   | IgG      |
| Rosas-Aguirre, 2015 [75]     | Brazil                | CS                              | 651    | 2   | IgG      |
| Lu, 2020 [125]               | Bangladesh            | CS                              | 1239   | 1   | IgG      |
| Longley, 2021 [43]           | Thailand, Brazil      | CH                              | 1754   | 20  | IgG, IgM |
| Nyunt, 2018 [69]             | Myanmar               | CH                              | 1182   | 3   | IgG      |
| Chotirat, 2021 [9]           | Thailand              | CS                              | 4255   | 23  | IgG      |
| Sáenz, 2017 [7]              | Ecuador               | CS                              | 648    | 2   | IgG      |
| Cunha, 2014 [118]            | Brazil                | CS                              | 1330   | 3   | IgG      |
| Ghinai, 2017 [121]           | Myanmar               | CS                              | 1638   | 1   | IgG      |
| Surendra, 2019 [103]         | Indonesia             | CS                              | 1624   | 2   | IgG      |
| Feleke, 2019 [59]            | Ethiopia              | CS                              | 180    | 1   | IgG      |
| Rosado, 2021 [23]            | Peru                  | VS                              | 590    | 34  | IgG      |
| Pires, 2018 [44]             | Brazil                | CH                              | 102    | 4   | IgG      |
| Niang, 2017 [92]             | Senegal               | Retrospective Serological Study | 48     | 1   | IgG      |
| Monteiro, 2021 [60]          | Brazil                | Retrospective Serological Study | 416    | 1   | IgG      |
| Yalew, 2017 [82]             | Ethiopia              | CS                              | 7878   | 2   | IgG      |
| Surendra, 2020 [76]          | Indonesia             | CS                              | 9453   | 5   | N/A      |
| Oviedo, 2022 [30]            | Haiti                 | CS                              | 24,559 | 1   | IgG      |
| Kerkhof, 2016a [47]          | Cambodia              | CS                              | 6502   | 2   | IgG      |
| Edwards, 2021 [105]          | Myanmar               | CS                              | 11,653 | 2   | IgG      |
| San, 2022 [127]              | Vietnam               | CS                              | 3283   | 4   | IgG      |

|                            |                  |    |        |     |     |
|----------------------------|------------------|----|--------|-----|-----|
| Yao, 2022 [15]             | China            | CS | 3064   | 3   | N/A |
| Keffale, 2019 [84]         | Ethiopia         | CS | 1144   | 1   | IgG |
| Kim, 2010 [45]             | Myanmar          | CS | 100    | 1   | IgG |
| Tadesse, 2017 [94]         | Ethiopia         | CS | 845    | 2   | N/A |
| Poirier, 2016 [97]         | Benin            | CS | 1234   | 2   | IgG |
| Khaireh, 2012 [116]        | Djibouti         | CS | 1910   | 2   | IgG |
| Labadie-Bracho, 2020 [124] | Suriname         | CS | 197    | 1   | IgG |
| Lee, 2020 [93]             | Korea            | CS | 777    | 3   | IgG |
| Assefa, 2019 [85]          | Ethiopia         | CS | 53,335 | 2   | IgG |
| Longley, 2020 [41]         | Thailand, Brazil | CH | 65     | 342 | IgG |

CS = cross-sectional, CH = cohort, VS = validation study, DC = descriptive study, N/A = not available.
